# Supplementary material for: DFT Investigations on the Ring-Opening Polymerization of Trimethylene Carbonate Catalysed by Heterocyclic Nitrogen Bases
Source: MDPI journal article supplement (doi:10.3390/catal12101280), 2022-10-20
Supplement: s1 [file s1]

# DFT Investigations on the Ring-Opening Polymerization of Trimethylene Carbonate Catalysed by Heterocyclic Nitrogen Bases

Michael Lalanne-Tisné <sup>1,2</sup>, Audrey Favrelle-Huret <sup>2</sup>, Wim Thielemans <sup>1,\*</sup>, João P. Prates Ramalho <sup>3,\*</sup> and Philippe Zinck <sup>2,\*</sup>

<sup>1</sup> Sustainable Materials Lab, Department of Chemical Engineering, KU Leuven, Campus Kulak Kortrijk, Etienne Sabbelaan 53, Box 7659, B-8500 Kortrijk, Belgium

<sup>2</sup> Université de Lille, CNRS, Centrale Lille, Univ. Artois, UMR 8181—UCCS—Unité de Catalyse et Chimie du Solide, F-59000 Lille, France

<sup>3</sup> Chemistry Department, LAQV-REQUIMTE and Hercules Centre, Sciences and Technology School, University of Évora, Rua Romão Ramalho 59, 7000-671 Évora, Portugal

\* Correspondence: wim.thielemans@kuleuven.be (W.T.); jpcar@uevora.pt (J.P.P.R.); philippe.zinck@univ-lille.fr (P.Z.)

## 1. Quantum chemical calculations

All calculations in this study were conducted with the Gaussian 16 program package.[29] Geometries of the chemical relevant species were obtained by density functional theory (DFT) from optimizations using the hybrid meta-GGA exchange–correlation functional M06-2X [30] together with the 6-31+G(d,p) basis set. In all calculations solvent effects were taken into account by using the SMD continuum solvation model [33] with the parameters of dichloromethane. Frequency analysis confirmed optimized geometries as energy minimum by the non-existence of imaginary frequencies or as transition states by the existence of a sole imaginary frequency that links reactants and products along the reaction coordinate.

## Coordinates of selected structures of the H-bond / alcohol activation pathway of the TBD catalysed ring-opening polymerization of TMC

### TS1

|   |              |              |              |
|---|--------------|--------------|--------------|
| O | -1.903523000 | -0.330567000 | -1.260954000 |
| C | -2.202886000 | -0.972302000 | -0.094736000 |
| C | -2.534616000 | 0.929097000  | -1.530911000 |
| H | -2.066643000 | 1.694119000  | -0.903188000 |
| H | -2.318477000 | 1.138113000  | -2.580321000 |
| O | -3.495993000 | -0.912675000 | 0.326886000  |
| O | -1.558625000 | -1.982505000 | 0.182723000  |
| C | -4.209481000 | 0.318571000  | 0.152749000  |
| H | -5.251773000 | 0.079791000  | 0.371651000  |
| H | -3.835011000 | 1.039212000  | 0.887505000  |
| C | -4.023265000 | 0.838238000  | -1.259236000 |
| H | -4.495100000 | 0.156444000  | -1.975182000 |
| H | -4.485579000 | 1.824605000  | -1.361534000 |
| N | 0.850463000  | 0.981602000  | 0.450669000  |
| C | 1.325902000  | 2.343441000  | 0.633427000  |
| C | 1.693962000  | 0.015840000  | 0.121611000  |
| N | 2.999994000  | 0.250674000  | -0.139704000 |
| C | 3.543474000  | 1.610843000  | -0.176075000 |
| N | 1.228015000  | -1.251528000 | 0.065362000  |
| C | 3.955431000  | -0.811951000 | -0.464612000 |

---

|   |              |              |              |
|---|--------------|--------------|--------------|
| H | 4.138861000  | -0.804316000 | -1.547456000 |
| H | 4.898204000  | -0.565096000 | 0.034841000  |
| C | 3.454533000  | -2.175982000 | -0.019418000 |
| H | 3.499076000  | -2.257201000 | 1.071792000  |
| C | 2.016455000  | -2.345185000 | -0.479608000 |
| H | 4.092129000  | -2.952503000 | -0.448960000 |
| H | 1.969372000  | -2.356659000 | -1.577581000 |
| H | 1.586488000  | -3.279091000 | -0.112245000 |
| H | 0.215115000  | -1.388649000 | 0.136438000  |
| H | 0.476305000  | 3.016056000  | 0.487212000  |
| H | 1.690924000  | 2.491207000  | 1.660356000  |
| H | 4.253351000  | 1.654632000  | -1.008721000 |
| C | 2.441973000  | 2.642643000  | -0.356064000 |
| H | 4.102170000  | 1.797903000  | 0.750376000  |
| H | 2.851458000  | 3.643018000  | -0.193914000 |
| H | 2.047029000  | 2.594173000  | -1.376793000 |
| O | -1.497294000 | 0.443632000  | 1.062914000  |
| C | -1.528410000 | 0.017070000  | 2.393032000  |
| H | -0.272693000 | 0.711218000  | 0.715464000  |
| H | -2.437097000 | 0.367631000  | 2.907142000  |
| H | -1.500973000 | -1.082422000 | 2.464120000  |
| H | -0.661392000 | 0.407569000  | 2.951202000  |

# INT1

|   |              |              |              |
|---|--------------|--------------|--------------|
| O | -1.877341000 | -0.426536000 | -1.103136000 |
| C | -2.059470000 | -0.561768000 | 0.302188000  |
| C | -2.768430000 | 0.473592000  | -1.757612000 |
| H | -2.566233000 | 1.502617000  | -1.432153000 |
| H | -2.542547000 | 0.396570000  | -2.824709000 |
| O | -3.411550000 | -0.891685000 | 0.595389000  |
| O | -1.251555000 | -1.432226000 | 0.805308000  |
| C | -4.380361000 | -0.003298000 | 0.048179000  |
| H | -5.355556000 | -0.415840000 | 0.320528000  |
| H | -4.282401000 | 0.990128000  | 0.509249000  |
| C | -4.211086000 | 0.095183000  | -1.460210000 |
| H | -4.438478000 | -0.874716000 | -1.917166000 |
| H | -4.895128000 | 0.843565000  | -1.874369000 |
| N | 0.993081000  | 1.038008000  | 0.255169000  |
| C | 1.516225000  | 2.391516000  | 0.359959000  |
| C | 1.778434000  | -0.032036000 | 0.039192000  |
| N | 3.096082000  | 0.138801000  | -0.183911000 |
| C | 3.714072000  | 1.463213000  | -0.295913000 |
| N | 1.224434000  | -1.239235000 | 0.050218000  |
| C | 4.012487000  | -0.998742000 | -0.311547000 |
| H | 4.251806000  | -1.142768000 | -1.372942000 |
| H | 4.937663000  | -0.728880000 | 0.207852000  |
| C | 3.413592000  | -2.264167000 | 0.280627000  |
| H | 3.389197000  | -2.192268000 | 1.373224000  |
| C | 1.997219000  | -2.434848000 | -0.247383000 |
| H | 4.035069000  | -3.120208000 | 0.006781000  |
| H | 2.017702000  | -2.619447000 | -1.329724000 |
| H | 1.493701000  | -3.279592000 | 0.227236000  |
| H | 0.177482000  | -1.317725000 | 0.320454000  |

---

|   |              |             |              |
|---|--------------|-------------|--------------|
| H | 0.704983000  | 3.078919000 | 0.112463000  |
| H | 1.842240000  | 2.602335000 | 1.387101000  |
| H | 4.460162000  | 1.405846000 | -1.094984000 |
| C | 2.684295000  | 2.538310000 | -0.602077000 |
| H | 4.241061000  | 1.688164000 | 0.640455000  |
| H | 3.148094000  | 3.521996000 | -0.497297000 |
| H | 2.324404000  | 2.433309000 | -1.630919000 |
| O | -1.833528000 | 0.801857000 | 0.785872000  |
| C | -1.917705000 | 0.915123000 | 2.194110000  |
| H | -0.012446000 | 0.884106000 | 0.371338000  |
| H | -2.930343000 | 0.689776000 | 2.550167000  |
| H | -1.209801000 | 0.237878000 | 2.685271000  |
| H | -1.669657000 | 1.949463000 | 2.447264000  |

# *INT2*

|   |              |              |              |
|---|--------------|--------------|--------------|
| O | 1.991242000  | 0.575542000  | -0.797213000 |
| C | 2.132032000  | -0.691138000 | -0.079239000 |
| C | 2.772888000  | 1.650994000  | -0.286154000 |
| H | 3.840728000  | 1.421050000  | -0.407629000 |
| H | 2.536808000  | 2.523996000  | -0.902090000 |
| O | 1.836229000  | -0.455339000 | 1.290644000  |
| O | 1.332934000  | -1.561983000 | -0.598928000 |
| C | 2.605631000  | 0.564787000  | 1.921850000  |
| H | 2.232298000  | 0.630491000  | 2.947449000  |
| H | 3.662171000  | 0.269383000  | 1.954575000  |
| C | 2.444421000  | 1.883452000  | 1.180786000  |
| H | 1.408353000  | 2.232595000  | 1.274494000  |
| H | 3.106718000  | 2.644738000  | 1.606713000  |
| N | -0.889231000 | 0.878108000  | -0.636258000 |
| C | -1.376617000 | 2.200198000  | -0.997706000 |
| C | -1.698709000 | -0.103118000 | -0.200489000 |
| N | -3.007535000 | 0.145367000  | -0.001034000 |
| C | -3.589128000 | 1.482140000  | -0.153677000 |
| N | -1.174358000 | -1.302620000 | 0.025058000  |
| C | -3.944555000 | -0.915021000 | 0.382461000  |
| H | -4.158165000 | -0.827663000 | 1.455526000  |
| H | -4.877534000 | -0.735252000 | -0.161345000 |
| C | -3.389706000 | -2.291955000 | 0.055222000  |
| H | -3.391386000 | -2.448839000 | -1.028711000 |
| C | -1.964773000 | -2.390021000 | 0.578829000  |
| H | -4.023853000 | -3.054760000 | 0.513456000  |
| H | -1.962041000 | -2.347575000 | 1.676299000  |
| H | -1.493631000 | -3.328205000 | 0.278427000  |
| H | -0.121460000 | -1.430352000 | -0.186288000 |
| H | -0.544050000 | 2.899675000  | -0.895944000 |
| H | -1.710512000 | 2.217796000  | -2.043349000 |
| H | -4.327284000 | 1.606729000  | 0.644937000  |
| C | -2.526578000 | 2.566043000  | -0.073071000 |
| H | -4.120132000 | 1.531324000  | -1.113149000 |
| H | -2.964773000 | 3.523579000  | -0.364279000 |
| H | -2.155620000 | 2.653307000  | 0.953743000  |
| O | 3.513635000  | -1.030031000 | -0.102029000 |

---

|   |             |              |              |
|---|-------------|--------------|--------------|
| C | 3.984106000 | -1.376217000 | -1.389307000 |
| H | 0.108545000 | 0.671266000  | -0.734455000 |
| H | 3.448823000 | -2.246524000 | -1.782889000 |
| H | 3.873036000 | -0.541453000 | -2.093159000 |
| H | 5.044437000 | -1.617673000 | -1.283514000 |

TS2

|   |              |              |              |
|---|--------------|--------------|--------------|
| O | 1.642038000  | 0.837268000  | -0.665473000 |
| C | 2.332451000  | -0.911462000 | -0.095741000 |
| C | 2.183747000  | 1.869387000  | 0.108550000  |
| H | 3.262000000  | 1.975458000  | -0.109333000 |
| H | 1.715522000  | 2.835861000  | -0.144916000 |
| O | 2.054740000  | -0.822482000 | 1.231151000  |
| O | 1.670883000  | -1.690138000 | -0.785225000 |
| C | 2.636790000  | 0.258900000  | 1.979076000  |
| H | 2.441976000  | 0.005317000  | 3.023564000  |
| H | 3.719492000  | 0.274029000  | 1.818607000  |
| C | 2.006837000  | 1.587847000  | 1.601097000  |
| H | 0.936144000  | 1.562013000  | 1.842912000  |
| H | 2.471279000  | 2.379337000  | 2.202209000  |
| N | -0.872130000 | 0.923398000  | -0.666010000 |
| C | -1.479046000 | 2.202481000  | -0.999840000 |
| C | -1.627714000 | -0.083098000 | -0.245400000 |
| N | -2.955488000 | 0.058580000  | -0.031177000 |
| C | -3.618153000 | 1.364153000  | -0.093638000 |
| N | -1.049964000 | -1.279104000 | -0.034759000 |
| C | -3.827122000 | -1.062374000 | 0.330132000  |
| H | -4.056145000 | -1.000162000 | 1.402413000  |
| H | -4.766256000 | -0.935547000 | -0.218991000 |
| C | -3.189508000 | -2.401974000 | 0.000416000  |
| H | -3.174197000 | -2.557088000 | -1.083535000 |
| C | -1.764979000 | -2.410256000 | 0.531827000  |
| H | -3.777843000 | -3.202806000 | 0.454991000  |
| H | -1.770523000 | -2.358207000 | 1.629064000  |
| H | -1.233007000 | -3.317550000 | 0.239429000  |
| H | -0.059028000 | -1.385346000 | -0.280640000 |
| H | -0.697267000 | 2.964206000  | -0.946140000 |
| H | -1.862106000 | 2.192425000  | -2.030061000 |
| H | -4.317467000 | 1.416502000  | 0.747975000  |
| C | -2.613923000 | 2.503359000  | -0.031699000 |
| H | -4.205269000 | 1.417748000  | -1.019669000 |
| H | -3.114231000 | 3.440291000  | -0.289758000 |
| H | -2.210437000 | 2.596590000  | 0.982680000  |
| O | 3.639609000  | -0.642118000 | -0.339519000 |
| C | 3.996073000  | -0.669574000 | -1.717705000 |
| H | 0.277803000  | 0.839987000  | -0.661718000 |
| H | 3.902845000  | -1.680860000 | -2.121862000 |
| H | 3.353376000  | 0.016369000  | -2.275959000 |
| H | 5.035538000  | -0.343246000 | -1.767557000 |

**Coordinates of selected structures of the nucleophilic mechanism of the TBD catalysed ring-opening polymerization of TMC**

---

*TS1*

|   |              |              |              |
|---|--------------|--------------|--------------|
| O | 1.842261000  | -0.845312000 | -0.841875000 |
| C | 1.783981000  | 0.561015000  | -0.758193000 |
| C | 3.102128000  | -1.354811000 | -0.376162000 |
| H | 3.121457000  | -2.408935000 | -0.656856000 |
| H | 3.909018000  | -0.840226000 | -0.909561000 |
| O | 2.433573000  | 1.016828000  | 0.373476000  |
| O | 1.873948000  | 1.238019000  | -1.776571000 |
| C | 2.408426000  | 0.111071000  | 1.477458000  |
| H | 2.823895000  | 0.656078000  | 2.326360000  |
| H | 1.364772000  | -0.141251000 | 1.696064000  |
| C | 3.215323000  | -1.144958000 | 1.134825000  |
| H | 4.267374000  | -1.029296000 | 1.411914000  |
| H | 2.811180000  | -2.000934000 | 1.683909000  |
| N | -0.010048000 | 0.760398000  | -0.167583000 |
| C | -0.339964000 | 2.173406000  | -0.267463000 |
| C | -0.998976000 | -0.099126000 | -0.029011000 |
| N | -2.302302000 | 0.279400000  | 0.098716000  |
| C | -2.687940000 | 1.676154000  | 0.299343000  |
| N | -0.720924000 | -1.429095000 | 0.015727000  |
| C | -3.411898000 | -0.673446000 | 0.134675000  |
| H | -3.738630000 | -0.814068000 | 1.174944000  |
| H | -4.244455000 | -0.221882000 | -0.415758000 |
| C | -3.023879000 | -2.005693000 | -0.481078000 |
| H | -2.883212000 | -1.894577000 | -1.561679000 |
| C | -1.726422000 | -2.469130000 | 0.159195000  |
| H | -3.821046000 | -2.733243000 | -0.308712000 |
| H | -1.897804000 | -2.696777000 | 1.220080000  |
| H | -1.344323000 | -3.372403000 | -0.320598000 |
| H | 0.225122000  | -1.663672000 | -0.258530000 |
| H | 0.562525000  | 2.736570000  | -0.016371000 |
| H | -0.611566000 | 2.437599000  | -1.299826000 |
| H | -3.445945000 | 1.700983000  | 1.090982000  |
| C | -1.484270000 | 2.522509000  | 0.671942000  |
| H | -3.154837000 | 2.053287000  | -0.620346000 |
| H | -1.744651000 | 3.581819000  | 0.596719000  |
| H | -1.183265000 | 2.317770000  | 1.705805000  |

*INT1*

|   |             |              |              |
|---|-------------|--------------|--------------|
| O | 1.739296000 | -0.920659000 | -0.777374000 |
| C | 1.588517000 | 0.519522000  | -0.730063000 |
| C | 3.042611000 | -1.332347000 | -0.366428000 |
| H | 3.147992000 | -2.376945000 | -0.667033000 |
| H | 3.789596000 | -0.741243000 | -0.907571000 |
| O | 2.311543000 | 0.987772000  | 0.416256000  |
| O | 1.865688000 | 1.146788000  | -1.778534000 |
| C | 2.322185000 | 0.080275000  | 1.509411000  |
| H | 2.721540000 | 0.624922000  | 2.368143000  |
| H | 1.293873000 | -0.223825000 | 1.748370000  |
| C | 3.177419000 | -1.139694000 | 1.146501000  |
| H | 4.228141000 | -0.977938000 | 1.407519000  |
| H | 2.824496000 | -2.021766000 | 1.691018000  |
| N | 0.055144000 | 0.743444000  | -0.314429000 |

---

|   |              |              |              |
|---|--------------|--------------|--------------|
| C | -0.258450000 | 2.172625000  | -0.380150000 |
| C | -0.946714000 | -0.119158000 | -0.108012000 |
| N | -2.210803000 | 0.320321000  | 0.114721000  |
| C | -2.543386000 | 1.720918000  | 0.385603000  |
| N | -0.729135000 | -1.447441000 | -0.109476000 |
| C | -3.362300000 | -0.584051000 | 0.207694000  |
| H | -3.636313000 | -0.700316000 | 1.264872000  |
| H | -4.196847000 | -0.090181000 | -0.300770000 |
| C | -3.076023000 | -1.936053000 | -0.416566000 |
| H | -3.003663000 | -1.845652000 | -1.505417000 |
| C | -1.759392000 | -2.442409000 | 0.142790000  |
| H | -3.889836000 | -2.625183000 | -0.179019000 |
| H | -1.855960000 | -2.633274000 | 1.219670000  |
| H | -1.445399000 | -3.369378000 | -0.340029000 |
| H | 0.219170000  | -1.721990000 | -0.347293000 |
| H | 0.675948000  | 2.707148000  | -0.215521000 |
| H | -0.624601000 | 2.433887000  | -1.381289000 |
| H | -3.229996000 | 1.734880000  | 1.239269000  |
| C | -1.293117000 | 2.525327000  | 0.670142000  |
| H | -3.077100000 | 2.129159000  | -0.482013000 |
| H | -1.526858000 | 3.592362000  | 0.636971000  |
| H | -0.900940000 | 2.290114000  | 1.666088000  |

#### TS2

|   |              |              |              |
|---|--------------|--------------|--------------|
| O | 1.687940000  | -0.827592000 | -1.116190000 |
| C | 1.336265000  | 0.830085000  | -0.210509000 |
| C | 2.700971000  | -1.536758000 | -0.447381000 |
| H | 2.270291000  | -2.195545000 | 0.334442000  |
| H | 3.225389000  | -2.192621000 | -1.158096000 |
| O | 1.600014000  | 0.360684000  | 1.053832000  |
| O | 2.034295000  | 1.684617000  | -0.743414000 |
| C | 3.004132000  | 0.203283000  | 1.320745000  |
| H | 3.459513000  | 1.188095000  | 1.467937000  |
| H | 3.028710000  | -0.341569000 | 2.267923000  |
| C | 3.699204000  | -0.589452000 | 0.215063000  |
| H | 4.099103000  | 0.084329000  | -0.547505000 |
| H | 4.532629000  | -1.154586000 | 0.646382000  |
| N | -0.103284000 | 0.895832000  | -0.407961000 |
| C | -0.678581000 | 2.200003000  | -0.746058000 |
| C | -0.964158000 | -0.119011000 | -0.086759000 |
| N | -2.255827000 | 0.162735000  | 0.160640000  |
| C | -2.794227000 | 1.518099000  | 0.319507000  |
| N | -0.497829000 | -1.353829000 | -0.092444000 |
| C | -3.241042000 | -0.910655000 | 0.337794000  |
| H | -3.439568000 | -1.029909000 | 1.410422000  |
| H | -4.168002000 | -0.578808000 | -0.140366000 |
| C | -2.760463000 | -2.219559000 | -0.267702000 |
| H | -2.768022000 | -2.152087000 | -1.360751000 |
| C | -1.343100000 | -2.495528000 | 0.213695000  |
| H | -3.437201000 | -3.023797000 | 0.031070000  |
| H | -1.340141000 | -2.689420000 | 1.294101000  |
| H | -0.915064000 | -3.368229000 | -0.283686000 |
| H | 0.499485000  | -1.355949000 | -0.592669000 |

---

|   |              |             |              |
|---|--------------|-------------|--------------|
| H | 0.143844000  | 2.909935000 | -0.796662000 |
| H | -1.154632000 | 2.151271000 | -1.733126000 |
| H | -3.369406000 | 1.540538000 | 1.251545000  |
| C | -1.696462000 | 2.566919000 | 0.322267000  |
| H | -3.490683000 | 1.696704000 | -0.509114000 |
| H | -2.135756000 | 3.547881000 | 0.123767000  |
| H | -1.195141000 | 2.604375000 | 1.294951000  |

### TS3

|   |              |              |              |
|---|--------------|--------------|--------------|
| O | -3.089645000 | -1.823565000 | -0.007389000 |
| C | -0.928972000 | 0.404063000  | -0.691890000 |
| O | -0.183750000 | 2.047373000  | -1.213302000 |
| C | -1.002768000 | 3.139219000  | -0.879691000 |
| C | -3.967095000 | -1.051213000 | 0.795125000  |
| H | -4.687104000 | -0.512177000 | 0.160322000  |
| H | -4.535465000 | -1.760790000 | 1.404977000  |
| O | -1.184293000 | 0.675095000  | 0.627152000  |
| O | -1.846614000 | 0.167550000  | -1.487504000 |
| C | -2.514124000 | 1.069316000  | 0.999182000  |
| H | -2.382137000 | 1.915130000  | 1.679587000  |
| H | -3.064669000 | 1.408340000  | 0.117359000  |
| C | -3.261394000 | -0.056039000 | 1.709794000  |
| H | -2.564887000 | -0.582284000 | 2.373729000  |
| H | -4.028220000 | 0.407133000  | 2.344076000  |
| N | 0.297352000  | -0.354609000 | -0.795690000 |
| C | 0.247349000  | -1.672767000 | -1.429224000 |
| C | 1.435658000  | -0.007282000 | -0.098381000 |
| N | 2.327193000  | -0.976214000 | 0.200924000  |
| C | 2.094128000  | -2.412744000 | 0.022210000  |
| N | 1.615942000  | 1.261585000  | 0.186569000  |
| C | 3.631636000  | -0.639035000 | 0.779823000  |
| H | 3.607819000  | -0.863839000 | 1.853929000  |
| H | 4.373787000  | -1.298250000 | 0.317316000  |
| C | 3.986104000  | 0.820778000  | 0.546401000  |
| H | 4.229711000  | 0.983207000  | -0.509151000 |
| C | 2.791584000  | 1.685324000  | 0.927774000  |
| H | 4.864878000  | 1.078209000  | 1.143284000  |
| H | 2.606787000  | 1.613489000  | 2.008520000  |
| H | 2.974874000  | 2.736963000  | 0.695032000  |
| H | -2.694548000 | -1.218978000 | -0.662140000 |
| H | -0.767946000 | -1.830396000 | -1.787186000 |
| H | 0.919543000  | -1.692618000 | -2.296203000 |
| H | 2.340331000  | -2.911469000 | 0.966405000  |
| C | 0.666786000  | -2.712226000 | -0.402045000 |
| H | 2.798829000  | -2.772162000 | -0.738650000 |
| H | 0.619734000  | -3.720622000 | -0.821361000 |
| H | -0.015532000 | -2.661787000 | 0.452885000  |
| H | 0.766961000  | 1.902273000  | -0.477186000 |
| H | -2.020532000 | 2.974161000  | -1.255979000 |
| H | -1.049392000 | 3.301327000  | 0.207395000  |
| H | -0.615171000 | 4.053812000  | -1.345689000 |

---

*TS4*

|   |              |              |              |
|---|--------------|--------------|--------------|
| O | -3.749022000 | -1.302411000 | -0.331440000 |
| C | -1.210281000 | 1.281801000  | -0.318057000 |
| O | -0.507729000 | 2.407983000  | -0.671321000 |
| C | -0.339047000 | 2.568012000  | -2.072117000 |
| C | -3.545170000 | -1.547496000 | 1.051032000  |
| H | -4.407988000 | -1.178013000 | 1.627875000  |
| H | -3.501589000 | -2.633548000 | 1.189694000  |
| O | -1.262488000 | 1.314760000  | 1.056077000  |
| O | -2.165507000 | 0.876054000  | -0.999605000 |
| C | -2.368527000 | 0.628070000  | 1.646291000  |
| H | -2.373184000 | 0.974790000  | 2.681133000  |
| H | -3.290809000 | 0.978268000  | 1.168738000  |
| C | -2.267846000 | -0.905686000 | 1.578967000  |
| H | -1.435467000 | -1.183773000 | 0.924146000  |
| H | -2.048831000 | -1.311379000 | 2.572216000  |
| N | 0.155445000  | -0.028070000 | -0.602990000 |
| C | -0.183059000 | -1.110735000 | -1.507725000 |
| C | 1.345613000  | -0.007037000 | -0.044584000 |
| N | 2.273585000  | -0.989222000 | -0.219276000 |
| C | 1.957465000  | -2.215676000 | -0.951654000 |
| N | 1.694357000  | 1.060757000  | 0.726757000  |
| C | 3.612305000  | -0.960095000 | 0.374683000  |
| H | 3.634673000  | -1.650360000 | 1.229600000  |
| H | 4.312702000  | -1.342146000 | -0.376170000 |
| C | 4.013936000  | 0.436593000  | 0.817019000  |
| H | 4.237551000  | 1.061858000  | -0.053778000 |
| C | 2.861585000  | 1.051061000  | 1.592451000  |
| H | 4.911524000  | 0.374877000  | 1.437331000  |
| H | 2.676275000  | 0.477347000  | 2.512079000  |
| H | 3.076480000  | 2.083778000  | 1.873629000  |
| H | -3.257718000 | -0.495663000 | -0.586867000 |
| H | -1.273212000 | -1.190734000 | -1.528633000 |
| H | 0.143216000  | -0.872905000 | -2.532583000 |
| H | 2.425310000  | -3.048547000 | -0.415360000 |
| C | 0.456241000  | -2.416869000 | -1.057082000 |
| H | 2.411748000  | -2.166551000 | -1.950479000 |
| H | 0.242404000  | -3.221150000 | -1.766180000 |
| H | 0.048105000  | -2.705640000 | -0.081377000 |
| H | 0.940301000  | 1.702843000  | 0.930346000  |
| H | 0.172115000  | 1.698288000  | -2.499614000 |
| H | -1.304362000 | 2.702486000  | -2.567181000 |
| H | 0.275727000  | 3.458863000  | -2.205034000 |

**Coordinates of selected structures of the H-bond / alcohol activation pathway of the DMAP catalysed ring-opening polymerization of TMC**

*INT1*

|   |             |              |              |
|---|-------------|--------------|--------------|
| O | 2.264023000 | -1.234598000 | 0.577769000  |
| C | 2.653920000 | -0.947540000 | -0.666165000 |
| C | 2.957799000 | -0.707978000 | 1.729133000  |
| H | 2.549402000 | 0.285888000  | 1.932359000  |
| H | 2.702958000 | -1.386796000 | 2.543349000  |



---

|   |              |              |              |
|---|--------------|--------------|--------------|
| O | 3.852872000  | -0.403320000 | -0.879587000 |
| O | 1.961719000  | -1.273229000 | -1.605546000 |
| C | 4.633242000  | 0.160533000  | 0.195889000  |
| H | 5.661496000  | 0.143806000  | -0.166401000 |
| H | 4.301902000  | 1.193925000  | 0.333242000  |
| C | 4.442925000  | -0.645389000 | 1.459559000  |
| H | 4.854916000  | -1.652989000 | 1.339653000  |
| H | 4.952682000  | -0.155694000 | 2.293597000  |
| N | -0.716763000 | 0.927913000  | 0.117038000  |
| C | -1.730956000 | 1.678711000  | 0.571984000  |
| C | -1.036411000 | -0.284252000 | -0.365457000 |
| C | -2.325475000 | -0.785284000 | -0.414573000 |
| C | -3.399888000 | 0.003487000  | 0.067307000  |
| H | -0.204259000 | -0.881558000 | -0.734009000 |
| H | -1.464903000 | 2.659649000  | 0.959548000  |
| C | -3.056513000 | 1.282192000  | 0.574552000  |
| H | -3.807399000 | 1.958232000  | 0.963853000  |
| O | 1.926712000  | 1.606242000  | -0.083915000 |
| C | 2.051458000  | 2.106912000  | -1.400239000 |
| H | 0.969196000  | 1.381170000  | 0.058894000  |
| H | 1.726831000  | 1.370908000  | -2.148278000 |
| H | 1.472608000  | 3.030000000  | -1.541182000 |
| H | 3.106506000  | 2.334836000  | -1.581817000 |
| H | -2.488116000 | -1.775560000 | -0.821096000 |
| N | -4.682379000 | -0.438549000 | 0.045001000  |
| C | -4.985852000 | -1.760661000 | -0.478078000 |
| H | -6.060534000 | -1.926895000 | -0.417071000 |
| H | -4.681871000 | -1.851817000 | -1.527406000 |
| H | -4.480474000 | -2.544322000 | 0.099115000  |
| C | -5.747174000 | 0.398143000  | 0.572847000  |
| H | -5.815550000 | 1.346668000  | 0.027417000  |
| H | -6.694710000 | -0.127607000 | 0.465767000  |
| H | -5.591745000 | 0.618598000  | 1.635868000  |

# TS1

|   |              |              |              |
|---|--------------|--------------|--------------|
| O | 2.038302000  | -1.233756000 | 0.306766000  |
| C | 2.483194000  | -0.432604000 | -0.746290000 |
| C | 2.565475000  | -0.977350000 | 1.610648000  |
| H | 2.144484000  | -0.041106000 | 1.996605000  |
| H | 2.216753000  | -1.803918000 | 2.234387000  |
| O | 3.858292000  | -0.212501000 | -0.743372000 |
| O | 1.973932000  | -0.664810000 | -1.851041000 |
| C | 4.468068000  | 0.114907000  | 0.505659000  |
| H | 5.543892000  | 0.118330000  | 0.315542000  |
| H | 4.157912000  | 1.123280000  | 0.808563000  |
| C | 4.080585000  | -0.902412000 | 1.563327000  |
| H | 4.494314000  | -1.883123000 | 1.303426000  |
| H | 4.476036000  | -0.605329000 | 2.539878000  |
| N | -0.527257000 | 0.634032000  | -0.041106000 |
| C | -1.368120000 | 1.377504000  | 0.698018000  |
| C | -1.011635000 | -0.411670000 | -0.736794000 |
| C | -2.345103000 | -0.749775000 | -0.721715000 |
| C | -3.259197000 | 0.017397000  | 0.052067000  |

---

|   |              |              |              |
|---|--------------|--------------|--------------|
| H | -0.270357000 | -0.964218000 | -1.308231000 |
| H | -0.923974000 | 2.206740000  | 1.240262000  |
| C | -2.716170000 | 1.115809000  | 0.775642000  |
| H | -3.338585000 | 1.752853000  | 1.389949000  |
| O | 1.913182000  | 1.082288000  | -0.149421000 |
| C | 2.181451000  | 2.120531000  | -1.067528000 |
| H | 0.654162000  | 0.865728000  | -0.083697000 |
| H | 2.042333000  | 1.771095000  | -2.098440000 |
| H | 1.496828000  | 2.956262000  | -0.879324000 |
| H | 3.211041000  | 2.478532000  | -0.947744000 |
| H | -2.673170000 | -1.602348000 | -1.301511000 |
| N | -4.572774000 | -0.280834000 | 0.098728000  |
| C | -5.091071000 | -1.413006000 | -0.657084000 |
| H | -6.162729000 | -1.490369000 | -0.482523000 |
| H | -4.921622000 | -1.280681000 | -1.731424000 |
| H | -4.618473000 | -2.348813000 | -0.339014000 |
| C | -5.477140000 | 0.525871000  | 0.906292000  |
| H | -5.481767000 | 1.568774000  | 0.570607000  |
| H | -6.485387000 | 0.127619000  | 0.808258000  |
| H | -5.193159000 | 0.497305000  | 1.964179000  |

INT2

|   |              |              |              |
|---|--------------|--------------|--------------|
| O | 2.153726000  | -0.891953000 | -0.632548000 |
| C | 2.406422000  | 0.547627000  | -0.479250000 |
| C | 2.822085000  | -1.747800000 | 0.293123000  |
| H | 2.441694000  | -1.570289000 | 1.307563000  |
| H | 2.573101000  | -2.772307000 | -0.000607000 |
| O | 3.824159000  | 0.747436000  | -0.521429000 |
| O | 1.786046000  | 1.213940000  | -1.361143000 |
| C | 4.576042000  | -0.008117000 | 0.419346000  |
| H | 5.625965000  | 0.242037000  | 0.241021000  |
| H | 4.316494000  | 0.296377000  | 1.443472000  |
| C | 4.320774000  | -1.496887000 | 0.232141000  |
| H | 4.704154000  | -1.812266000 | -0.745075000 |
| H | 4.834521000  | -2.073767000 | 1.008847000  |
| N | -0.581489000 | -0.545385000 | -0.439833000 |
| C | -1.370496000 | -1.585732000 | -0.109596000 |
| C | -1.086123000 | 0.698292000  | -0.571442000 |
| C | -2.421481000 | 0.941506000  | -0.381125000 |
| C | -3.299001000 | -0.127876000 | -0.035357000 |
| H | -0.351084000 | 1.451689000  | -0.839182000 |
| H | -0.881927000 | -2.549103000 | -0.019236000 |
| C | -2.714646000 | -1.422684000 | 0.098532000  |
| H | -3.307294000 | -2.288592000 | 0.360337000  |
| O | 1.977614000  | 0.767359000  | 0.892664000  |
| C | 2.053206000  | 2.123452000  | 1.271045000  |
| H | 0.442341000  | -0.690297000 | -0.570799000 |
| H | 1.430758000  | 2.753281000  | 0.624106000  |
| H | 1.690559000  | 2.192786000  | 2.300247000  |
| H | 3.086044000  | 2.495502000  | 1.229996000  |
| H | -2.783083000 | 1.953879000  | -0.499397000 |
| N | -4.612220000 | 0.072862000  | 0.155001000  |
| C | -5.180688000 | 1.406294000  | -0.007517000 |

---

|   |              |              |              |
|---|--------------|--------------|--------------|
| H | -6.251853000 | 1.355486000  | 0.177274000  |
| H | -4.736048000 | 2.110746000  | 0.703227000  |
| H | -5.019059000 | 1.778670000  | -1.024503000 |
| C | -5.481295000 | -1.042148000 | 0.512884000  |
| H | -5.164483000 | -1.497749000 | 1.456781000  |
| H | -6.496770000 | -0.670046000 | 0.632708000  |
| H | -5.479219000 | -1.808202000 | -0.270002000 |

*TS2*

|   |              |              |              |
|---|--------------|--------------|--------------|
| O | -1.954346000 | 0.900459000  | -0.597249000 |
| C | -2.501207000 | -0.685823000 | -0.545347000 |
| C | -2.455216000 | 1.758455000  | 0.434583000  |
| H | -2.077084000 | 1.420044000  | 1.407755000  |
| H | -2.080954000 | 2.769173000  | 0.239467000  |
| O | -3.884614000 | -0.521227000 | -0.561553000 |
| O | -2.007790000 | -1.298432000 | -1.499695000 |
| C | -4.453327000 | 0.270268000  | 0.484051000  |
| H | -5.534444000 | 0.205885000  | 0.340585000  |
| H | -4.202105000 | -0.163252000 | 1.459601000  |
| C | -3.972613000 | 1.710306000  | 0.392873000  |
| H | -4.324462000 | 2.152678000  | -0.545767000 |
| H | -4.385746000 | 2.292161000  | 1.223476000  |
| N | 0.504073000  | 0.604358000  | -0.378409000 |
| C | 1.367150000  | 1.615541000  | -0.187778000 |
| C | 0.987771000  | -0.650480000 | -0.396920000 |
| C | 2.323906000  | -0.942176000 | -0.227856000 |
| C | 3.253681000  | 0.112575000  | -0.023165000 |
| H | 0.247983000  | -1.428382000 | -0.565435000 |
| H | 0.942105000  | 2.615320000  | -0.180225000 |
| C | 2.720957000  | 1.429936000  | -0.008631000 |
| H | 3.352430000  | 2.295796000  | 0.141896000  |
| O | -2.047905000 | -0.973245000 | 0.766614000  |
| C | -2.217206000 | -2.344473000 | 1.091883000  |
| H | -0.798656000 | 0.785207000  | -0.514882000 |
| H | -1.624819000 | -2.981834000 | 0.426756000  |
| H | -1.872600000 | -2.468167000 | 2.120351000  |
| H | -3.271805000 | -2.640668000 | 1.025994000  |
| H | 2.640162000  | -1.976546000 | -0.260470000 |
| N | 4.572380000  | -0.124064000 | 0.147450000  |
| C | 5.073788000  | -1.490736000 | 0.140299000  |
| H | 6.145832000  | -1.473691000 | 0.329266000  |
| H | 4.594523000  | -2.089590000 | 0.922568000  |
| H | 4.898245000  | -1.973564000 | -0.827982000 |
| C | 5.495703000  | 0.986776000  | 0.327181000  |
| H | 5.263774000  | 1.552041000  | 1.237189000  |
| H | 6.507360000  | 0.593640000  | 0.413265000  |
| H | 5.462002000  | 1.670242000  | -0.528672000 |

**Coordinates of selected structures of the nucleophilic mechanism of the DMAP catalysed ring-opening polymerization of TMC**

*TS1*

|   |             |              |              |
|---|-------------|--------------|--------------|
| O | 2.483216000 | -0.355819000 | -1.061244000 |
|---|-------------|--------------|--------------|

---

|   |              |              |              |
|---|--------------|--------------|--------------|
| C | 2.068114000  | 0.808432000  | -0.395349000 |
| C | 3.779759000  | -0.778725000 | -0.622726000 |
| H | 4.099931000  | -1.549326000 | -1.325556000 |
| H | 4.475220000  | 0.065573000  | -0.696377000 |
| O | 2.446456000  | 0.780789000  | 0.945257000  |
| O | 2.118850000  | 1.906063000  | -0.954314000 |
| C | 2.571419000  | -0.522986000 | 1.514534000  |
| H | 2.773696000  | -0.368161000 | 2.575528000  |
| H | 1.614843000  | -1.050757000 | 1.422556000  |
| C | 3.693589000  | -1.296924000 | 0.814319000  |
| H | 4.652299000  | -1.143916000 | 1.318748000  |
| H | 3.467653000  | -2.367382000 | 0.833328000  |
| N | 0.312219000  | 0.358184000  | -0.269189000 |
| C | -0.495302000 | 1.359427000  | 0.103309000  |
| C | -0.222648000 | -0.840004000 | -0.538499000 |
| C | -1.575974000 | -1.090507000 | -0.439242000 |
| C | -2.453919000 | -0.051850000 | -0.029839000 |
| H | 0.475283000  | -1.610018000 | -0.851000000 |
| H | -1.941042000 | -2.080507000 | -0.679573000 |
| H | -0.001807000 | 2.311047000  | 0.281520000  |
| C | -1.857548000 | 1.210084000  | 0.239920000  |
| H | -2.449411000 | 2.063728000  | 0.543265000  |
| N | -3.784730000 | -0.249964000 | 0.093201000  |
| C | -4.651498000 | 0.848807000  | 0.493496000  |
| H | -5.675048000 | 0.483408000  | 0.556355000  |
| H | -4.362578000 | 1.240283000  | 1.475088000  |
| H | -4.618124000 | 1.667879000  | -0.234461000 |
| C | -4.361231000 | -1.547869000 | -0.224925000 |
| H | -4.190898000 | -1.811929000 | -1.275242000 |
| H | -3.934445000 | -2.334010000 | 0.407672000  |
| H | -5.434736000 | -1.509031000 | -0.047497000 |

# INT1

|   |              |              |              |
|---|--------------|--------------|--------------|
| O | 2.428694000  | -0.325268000 | -1.068299000 |
| C | 1.943639000  | 0.795480000  | -0.337453000 |
| C | 3.758906000  | -0.661693000 | -0.674391000 |
| H | 4.139513000  | -1.351938000 | -1.429553000 |
| H | 4.378916000  | 0.242406000  | -0.691280000 |
| O | 2.349263000  | 0.681671000  | 1.019869000  |
| O | 2.080537000  | 1.940217000  | -0.814695000 |
| C | 2.557202000  | -0.650399000 | 1.479453000  |
| H | 2.747996000  | -0.576366000 | 2.552060000  |
| H | 1.641345000  | -1.240235000 | 1.342169000  |
| C | 3.732125000  | -1.283370000 | 0.725189000  |
| H | 4.679170000  | -1.085066000 | 1.236564000  |
| H | 3.596571000  | -2.368294000 | 0.672539000  |
| N | 0.333988000  | 0.398591000  | -0.279515000 |
| C | -0.487432000 | 1.396725000  | 0.088329000  |
| C | -0.180067000 | -0.814942000 | -0.542781000 |
| C | -1.527555000 | -1.077686000 | -0.442877000 |
| C | -2.422022000 | -0.049058000 | -0.040039000 |
| H | 0.529513000  | -1.572523000 | -0.851912000 |
| H | -1.877067000 | -2.073872000 | -0.679500000 |

---

|   |              |              |              |
|---|--------------|--------------|--------------|
| H | 0.000330000  | 2.350738000  | 0.259128000  |
| C | -1.842850000 | 1.224415000  | 0.222309000  |
| H | -2.446198000 | 2.072001000  | 0.519123000  |
| N | -3.745776000 | -0.264940000 | 0.082957000  |
| C | -4.629602000 | 0.821176000  | 0.485220000  |
| H | -5.646811000 | 0.439410000  | 0.549449000  |
| H | -4.343921000 | 1.216062000  | 1.466066000  |
| H | -4.608993000 | 1.638955000  | -0.243940000 |
| C | -4.303372000 | -1.576279000 | -0.218962000 |
| H | -4.129206000 | -1.848321000 | -1.266132000 |
| H | -3.863410000 | -2.346779000 | 0.423228000  |
| H | -5.377020000 | -1.550901000 | -0.041097000 |

#### TS2

|   |              |              |              |
|---|--------------|--------------|--------------|
| O | 2.183427000  | 0.326149000  | -0.763476000 |
| C | 1.410517000  | 1.211640000  | -0.201097000 |
| C | 3.627847000  | 0.509889000  | -0.611305000 |
| H | 3.958953000  | 1.137251000  | -1.442835000 |
| H | 3.792612000  | 1.010363000  | 0.342469000  |
| O | 3.561631000  | -1.047230000 | 1.739606000  |
| O | 1.700216000  | 2.290622000  | 0.246186000  |
| C | 3.636214000  | -1.711189000 | 0.563080000  |
| H | 4.249598000  | -2.649462000 | 0.596876000  |
| H | 2.639495000  | -2.061605000 | 0.178779000  |
| C | 4.246047000  | -0.866124000 | -0.587892000 |
| H | 5.319735000  | -0.718560000 | -0.411139000 |
| H | 4.129589000  | -1.364450000 | -1.560591000 |
| N | 0.043138000  | 0.743435000  | -0.175614000 |
| C | -0.932438000 | 1.624205000  | 0.196482000  |
| C | -0.280664000 | -0.552165000 | -0.471828000 |
| C | -1.566691000 | -0.989031000 | -0.414567000 |
| C | -2.619686000 | -0.096493000 | -0.032986000 |
| H | 0.543336000  | -1.201575000 | -0.736939000 |
| H | -1.760070000 | -2.026355000 | -0.649867000 |
| H | -0.593774000 | 2.627448000  | 0.422072000  |
| C | -2.236423000 | 1.250151000  | 0.271240000  |
| H | -2.964677000 | 1.993333000  | 0.565080000  |
| N | -3.884577000 | -0.496282000 | 0.039630000  |
| C | -4.930838000 | 0.434475000  | 0.463914000  |
| H | -5.876487000 | -0.100496000 | 0.509459000  |
| H | -4.707010000 | 0.835911000  | 1.456398000  |
| H | -5.024339000 | 1.260142000  | -0.248025000 |
| C | -4.244715000 | -1.874900000 | -0.293804000 |
| H | -3.936656000 | -2.114751000 | -1.315475000 |
| H | -3.772761000 | -2.575512000 | 0.401654000  |
| H | -5.324682000 | -1.980832000 | -0.221978000 |

#### INT2

|   |             |             |              |
|---|-------------|-------------|--------------|
| O | 2.152755000 | 0.219194000 | -0.423156000 |
| C | 1.350086000 | 1.185545000 | -0.076231000 |
| C | 3.588391000 | 0.505100000 | -0.368446000 |
| H | 3.783280000 | 1.323934000 | -1.065439000 |

---

|   |              |              |              |
|---|--------------|--------------|--------------|
| H | 3.818316000  | 0.805459000  | 0.655862000  |
| O | 4.258208000  | -1.490289000 | 1.609601000  |
| O | 1.623104000  | 2.326077000  | 0.195164000  |
| C | 4.028744000  | -1.881899000 | 0.335386000  |
| H | 4.645898000  | -2.757580000 | 0.001988000  |
| H | 2.971899000  | -2.216800000 | 0.146648000  |
| C | 4.307635000  | -0.774228000 | -0.712782000 |
| H | 5.379607000  | -0.536844000 | -0.703904000 |
| H | 4.041909000  | -1.097961000 | -1.729412000 |
| N | -0.018719000 | 0.723637000  | -0.055804000 |
| C | -1.005640000 | 1.648263000  | 0.140888000  |
| C | -0.338928000 | -0.598660000 | -0.206722000 |
| C | -1.631145000 | -1.018732000 | -0.180142000 |
| C | -2.695964000 | -0.078374000 | 0.002636000  |
| H | 0.490563000  | -1.281009000 | -0.337991000 |
| H | -1.823174000 | -2.076679000 | -0.294677000 |
| H | -0.669430000 | 2.669735000  | 0.265436000  |
| C | -2.316366000 | 1.292728000  | 0.172655000  |
| H | -3.053501000 | 2.068376000  | 0.328391000  |
| N | -3.968508000 | -0.457330000 | 0.014274000  |
| C | -5.031858000 | 0.530253000  | 0.200207000  |
| H | -5.991449000 | 0.019421000  | 0.171365000  |
| H | -4.926388000 | 1.030886000  | 1.167194000  |
| H | -5.005621000 | 1.277192000  | -0.598856000 |
| C | -4.321512000 | -1.865799000 | -0.166428000 |
| H | -3.971690000 | -2.226775000 | -1.138041000 |
| H | -3.880946000 | -2.476527000 | 0.626709000  |
| H | -5.403693000 | -1.962313000 | -0.122867000 |

### TS3

|   |              |              |              |
|---|--------------|--------------|--------------|
| N | 0.104105000  | 1.415726000  | -0.341330000 |
| C | -0.025692000 | 0.243763000  | -1.026353000 |
| C | -0.902941000 | 1.900042000  | 0.425960000  |
| C | -2.082749000 | 1.225170000  | 0.555694000  |
| C | -2.278362000 | -0.008790000 | -0.136699000 |
| H | -0.702978000 | 2.843098000  | 0.919136000  |
| H | -2.849996000 | 1.651205000  | 1.187673000  |
| H | 0.874006000  | -0.125436000 | -1.617530000 |
| C | -1.191511000 | -0.468215000 | -0.938757000 |
| H | -1.254363000 | -1.397309000 | -1.490714000 |
| N | -3.420270000 | -0.697827000 | -0.031589000 |
| C | -3.586617000 | -1.958648000 | -0.749398000 |
| H | -4.582874000 | -2.346703000 | -0.547175000 |
| H | -3.481557000 | -1.807939000 | -1.828313000 |
| H | -2.847938000 | -2.696191000 | -0.419183000 |
| C | -4.500578000 | -0.207713000 | 0.818942000  |
| H | -4.173192000 | -0.132705000 | 1.861070000  |
| H | -4.847185000 | 0.774508000  | 0.482245000  |
| H | -5.332692000 | -0.906587000 | 0.765120000  |
| O | 2.232121000  | -0.900755000 | -2.209389000 |
| C | 1.348441000  | 2.211980000  | -0.502946000 |
| O | 1.342403000  | 3.370045000  | 0.112158000  |
| C | 2.619550000  | -1.541425000 | -1.065840000 |

---

|   |             |              |              |
|---|-------------|--------------|--------------|
| H | 1.746543000 | -1.915719000 | -0.462979000 |
| H | 3.222031000 | -2.457352000 | -1.266281000 |
| O | 2.451835000 | 1.432559000  | -0.499298000 |
| O | 1.281408000 | 2.792929000  | -1.920170000 |
| C | 2.687616000 | 0.464328000  | 0.539665000  |
| H | 3.254315000 | 0.960440000  | 1.335314000  |
| H | 1.733510000 | 0.120383000  | 0.957744000  |
| C | 3.452033000 | -0.693957000 | -0.075865000 |
| H | 4.340928000 | -0.298813000 | -0.585235000 |
| H | 3.798666000 | -1.330002000 | 0.751142000  |
| H | 1.411529000 | 3.687911000  | -1.196796000 |
| C | 2.232143000 | 2.357178000  | -2.926786000 |
| H | 2.296411000 | 1.264530000  | -2.865442000 |
| H | 1.829696000 | 2.690121000  | -3.883163000 |
| H | 3.205731000 | 2.809831000  | -2.733233000 |

TS4

|   |              |              |              |
|---|--------------|--------------|--------------|
| N | 0.112695000  | -0.649878000 | -0.188239000 |
| C | -0.332575000 | 0.594355000  | -0.525527000 |
| C | -0.748280000 | -1.591835000 | 0.281853000  |
| C | -2.087697000 | -1.350248000 | 0.379113000  |
| C | -2.617429000 | -0.082476000 | -0.011370000 |
| H | -0.314702000 | -2.542342000 | 0.561136000  |
| H | -2.722447000 | -2.143998000 | 0.749176000  |
| H | 0.452297000  | 1.408037000  | -0.740414000 |
| C | -1.671213000 | 0.885353000  | -0.451580000 |
| H | -1.977412000 | 1.889468000  | -0.715586000 |
| N | -3.928596000 | 0.180106000  | 0.049272000  |
| C | -4.436025000 | 1.478664000  | -0.383573000 |
| H | -5.523051000 | 1.461737000  | -0.337472000 |
| H | -4.066782000 | 2.281161000  | 0.263832000  |
| H | -4.134276000 | 1.686297000  | -1.414619000 |
| C | -4.859104000 | -0.819881000 | 0.563668000  |
| H | -4.585774000 | -1.118176000 | 1.580625000  |
| H | -5.858274000 | -0.389411000 | 0.586544000  |
| H | -4.873666000 | -1.707980000 | -0.076896000 |
| O | 1.470158000  | 2.619641000  | -0.842801000 |
| C | 1.586282000  | -0.946591000 | -0.217386000 |
| O | 2.198660000  | -0.254352000 | -1.231234000 |
| C | 2.361518000  | 2.918956000  | 0.151687000  |
| H | 3.155980000  | 3.624848000  | -0.184220000 |
| H | 1.879448000  | 3.440905000  | 1.017886000  |
| O | 2.179658000  | -0.644162000 | 0.986765000  |
| O | 1.662292000  | -2.312166000 | -0.399072000 |
| C | 2.150878000  | 0.723939000  | 1.454852000  |
| H | 1.118306000  | 1.091114000  | 1.409943000  |
| H | 2.407474000  | 0.615129000  | 2.510343000  |
| C | 3.102686000  | 1.702439000  | 0.751742000  |
| H | 3.847019000  | 2.057327000  | 1.477374000  |
| H | 3.638037000  | 1.178420000  | -0.043758000 |
| H | 1.579868000  | 0.058694000  | -1.907129000 |
| C | 2.993443000  | -2.833948000 | -0.421632000 |
| H | 2.894404000  | -3.878316000 | -0.716982000 |

---

|   |             |              |              |
|---|-------------|--------------|--------------|
| H | 3.602970000 | -2.300175000 | -1.155386000 |
| H | 3.450828000 | -2.768382000 | 0.568023000  |

INT3

|   |              |              |              |
|---|--------------|--------------|--------------|
| N | 0.141651000  | -0.111123000 | -0.629172000 |
| C | 0.531788000  | 0.516842000  | 0.496779000  |
| C | 1.047621000  | -0.785400000 | -1.362134000 |
| C | 2.377477000  | -0.822528000 | -1.026355000 |
| C | 2.832974000  | -0.146875000 | 0.140912000  |
| H | 0.659142000  | -1.295521000 | -2.236505000 |
| H | 3.054454000  | -1.377738000 | -1.661493000 |
| H | -0.256162000 | 1.003904000  | 1.059128000  |
| C | 1.842224000  | 0.529355000  | 0.906273000  |
| H | 2.090588000  | 1.054857000  | 1.818634000  |
| N | 4.127634000  | -0.153468000 | 0.503108000  |
| C | 4.549277000  | 0.527985000  | 1.720524000  |
| H | 5.624777000  | 0.406601000  | 1.835607000  |
| H | 4.322371000  | 1.598203000  | 1.668624000  |
| H | 4.053574000  | 0.103605000  | 2.600474000  |
| C | 5.108251000  | -0.873966000 | -0.299074000 |
| H | 5.135469000  | -0.487685000 | -1.323451000 |
| H | 6.092003000  | -0.739770000 | 0.146587000  |
| H | 4.881341000  | -1.945346000 | -0.330577000 |
| O | -2.384080000 | -0.519568000 | 2.105115000  |
| C | -1.420778000 | -0.301631000 | -0.950820000 |
| O | -1.870692000 | -1.336593000 | -0.363136000 |
| C | -3.689655000 | -0.015218000 | 1.909882000  |
| H | -4.335220000 | -0.786527000 | 1.459439000  |
| H | -4.099252000 | 0.212044000  | 2.900905000  |
| O | -1.899261000 | 0.960808000  | -0.530541000 |
| O | -1.484868000 | -0.401284000 | -2.351442000 |
| C | -3.320909000 | 1.052663000  | -0.402813000 |
| H | -3.627597000 | 1.921121000  | -0.997010000 |
| H | -3.791171000 | 0.159478000  | -0.829819000 |
| C | -3.746858000 | 1.243642000  | 1.047752000  |
| H | -3.127673000 | 2.030037000  | 1.498420000  |
| H | -4.783444000 | 1.606313000  | 1.045943000  |
| H | -2.102377000 | -0.903001000 | 1.234708000  |
| C | -1.210706000 | 0.780345000  | -3.091440000 |
| H | -1.121863000 | 0.473549000  | -4.135583000 |
| H | -2.022175000 | 1.508044000  | -2.993637000 |
| H | -0.272771000 | 1.252894000  | -2.775279000 |

TS5

|   |              |              |              |
|---|--------------|--------------|--------------|
| N | -0.056658000 | 0.045019000  | -0.882497000 |
| C | 0.420070000  | 1.043837000  | -0.131154000 |
| C | 0.717810000  | -1.023707000 | -1.109298000 |
| C | 1.994632000  | -1.140957000 | -0.606847000 |
| C | 2.529043000  | -0.096034000 | 0.195394000  |
| H | 0.267348000  | -1.809104000 | -1.710528000 |
| H | 2.563666000  | -2.034773000 | -0.826497000 |
| H | -0.252555000 | 1.881139000  | 0.025689000  |
| C | 1.684247000  | 1.022847000  | 0.420889000  |



---

|   |              |              |              |
|---|--------------|--------------|--------------|
| H | 2.004957000  | 1.863842000  | 1.021552000  |
| N | 3.773471000  | -0.165249000 | 0.716298000  |
| C | 4.272939000  | 0.914826000  | 1.554252000  |
| H | 5.279624000  | 0.665856000  | 1.885579000  |
| H | 4.313819000  | 1.859162000  | 0.999522000  |
| H | 3.640943000  | 1.054315000  | 2.438774000  |
| C | 4.602874000  | -1.336176000 | 0.471212000  |
| H | 4.775226000  | -1.480069000 | -0.601324000 |
| H | 5.566333000  | -1.192212000 | 0.957344000  |
| H | 4.139472000  | -2.242876000 | 0.877025000  |
| O | -1.651358000 | -1.269971000 | 1.426879000  |
| C | -1.750968000 | -0.057176000 | -1.553381000 |
| O | -2.192168000 | -1.177774000 | -1.225526000 |
| C | -2.802288000 | -0.596077000 | 1.895146000  |
| H | -3.711683000 | -1.168059000 | 1.649550000  |
| H | -2.722280000 | -0.566931000 | 2.987136000  |
| O | -2.265004000 | 1.103372000  | -1.013183000 |
| O | -1.479373000 | 0.105592000  | -2.894162000 |
| C | -3.358654000 | 0.987801000  | -0.092143000 |
| H | -3.895627000 | 1.930589000  | -0.222130000 |
| H | -4.011831000 | 0.168280000  | -0.409151000 |
| C | -2.961901000 | 0.831773000  | 1.377224000  |
| H | -2.048731000 | 1.406948000  | 1.574081000  |
| H | -3.762284000 | 1.295509000  | 1.968613000  |
| H | -1.763400000 | -1.374511000 | 0.457914000  |
| C | -1.047966000 | 1.385878000  | -3.335440000 |
| H | -0.830401000 | 1.278908000  | -4.399046000 |
| H | -1.827283000 | 2.138570000  | -3.192247000 |
| H | -0.136961000 | 1.697641000  | -2.811983000 |

*BICY1*

|   |              |              |              |
|---|--------------|--------------|--------------|
| O | -2.707139000 | 1.414106000  | -0.139031000 |
| C | -1.940016000 | 0.704019000  | -1.002261000 |
| C | -3.469123000 | 0.491751000  | 0.693095000  |
| H | -3.977300000 | 1.136481000  | 1.410684000  |
| H | -4.218161000 | 0.010073000  | 0.053440000  |
| O | -0.598885000 | -1.642720000 | 0.429441000  |
| O | -2.365549000 | 0.245742000  | -2.037101000 |
| C | -2.016614000 | -1.714356000 | 0.602389000  |
| H | -2.514988000 | -1.825368000 | -0.371530000 |
| H | -2.169164000 | -2.645113000 | 1.152731000  |
| C | -2.627941000 | -0.554331000 | 1.424815000  |
| H | -3.314511000 | -0.992031000 | 2.158193000  |
| H | -1.830103000 | -0.069141000 | 1.999660000  |
| N | -0.648219000 | 0.490102000  | -0.545374000 |
| C | -0.043527000 | 1.309202000  | 0.405571000  |
| C | -0.126357000 | -0.872175000 | -0.674592000 |
| C | 1.364807000  | -0.874632000 | -0.645334000 |
| C | 2.019233000  | 0.041608000  | 0.115763000  |
| H | -0.523582000 | -1.284573000 | -1.606281000 |
| H | 1.869013000  | -1.674193000 | -1.171620000 |
| H | -0.646157000 | 2.118941000  | 0.798285000  |
| C | 1.239154000  | 1.105343000  | 0.754058000  |

---

|   |             |              |              |
|---|-------------|--------------|--------------|
| H | 1.689319000 | 1.752343000  | 1.495844000  |
| N | 3.395250000 | 0.016786000  | 0.354609000  |
| C | 4.112506000 | 1.284725000  | 0.238023000  |
| H | 5.112755000 | 1.163018000  | 0.660124000  |
| H | 4.210782000 | 1.596011000  | -0.813899000 |
| H | 3.607321000 | 2.077500000  | 0.788208000  |
| C | 4.130494000 | -1.079257000 | -0.251524000 |
| H | 3.689480000 | -2.035192000 | 0.041069000  |
| H | 4.141294000 | -1.017494000 | -1.352353000 |
| H | 5.161669000 | -1.047893000 | 0.106324000  |
